# Supplementary material
Source: PubMed Central journal article supplement (PMC7042819)
Supplement: jamadermatol-156-401-s001.pdf [file jamadermatol-156-401-s001.pdf]

## Supplementary Online Content

Gordon LG, Rodriguez-Acevedo AJ, Køster B, et al. Association of indoor tanning regulations with health and economic outcomes in North American and Europe. *JAMA Dermatol*. Published online February 19, 2020. doi:10.1001/jamadermatol.2020.0001

**eFigure 1.** Illustration of Markov Model Health States and Possible Transitions

**eFigure 2.** Pooled Estimates of Ever Exposure to Indoor Tanning Among Adults After 2009

**eFigure 3.** Estimated Prevalence of Indoor Tanning by Age

**eFigure 4.** Incremental Cost per Life-year Scatterplot for Full Ban vs Current Use in North America

**eFigure 5.** Incremental Cost per Life-year Scatterplot for Full Ban vs Current Use in Europe

**eTable 1.** Comparison of Pooled Estimates on the Prevalence of Indoor Tanning

**eTable 2.** One-Way Sensitivity Analyse: Full Ban vs Current Sunbed Use

**eReferences**

This supplementary material has been provided by the authors to give readers additional information about their work.

eFigure S1. Illustration of Markov model health states and possible transitions

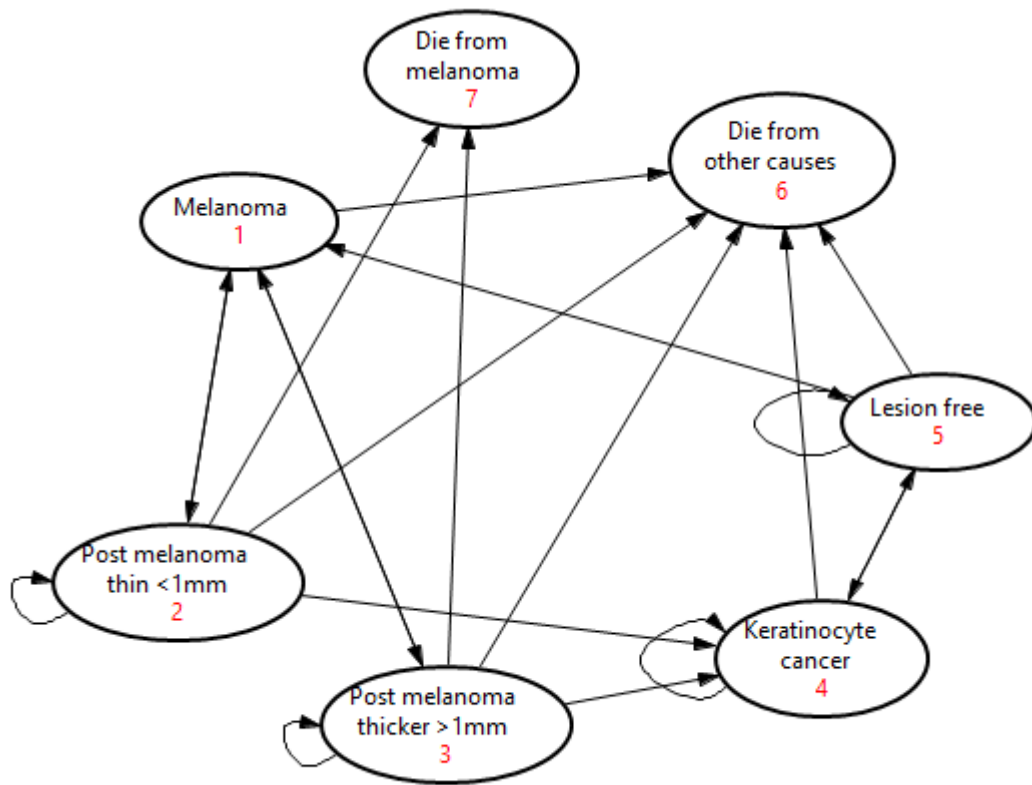

eFigure 2. Pooled estimates of ever exposure to indoor tanning among adults after 2009

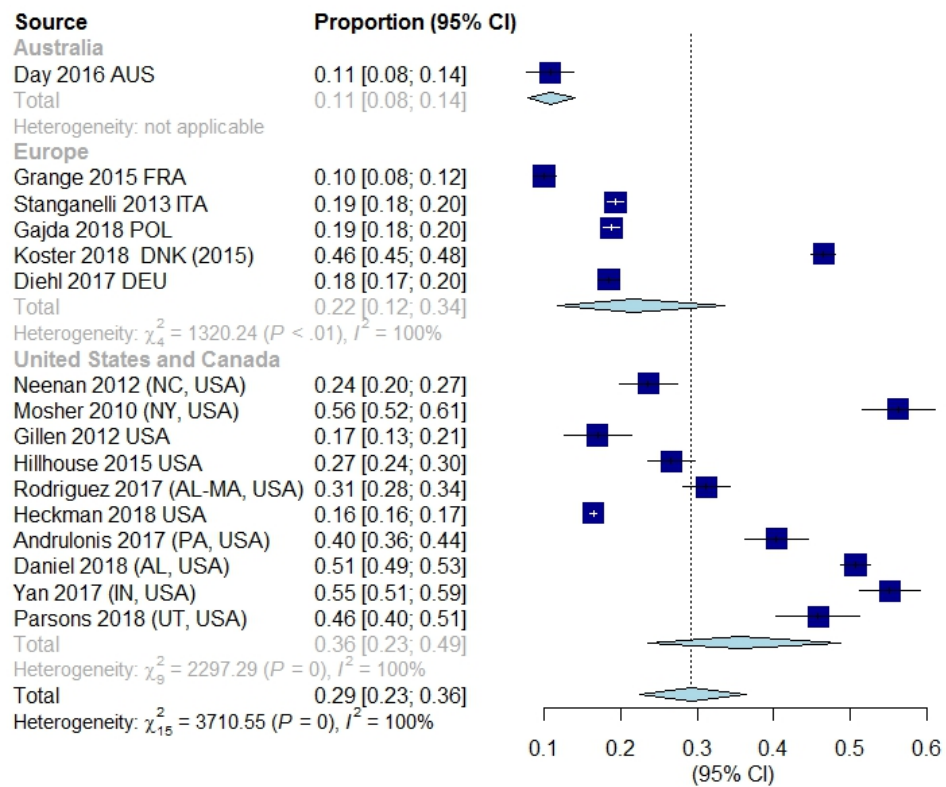

References<sup>3-18</sup>

eFigure 3. Estimated prevalence of indoor tanning by Age

a) North America

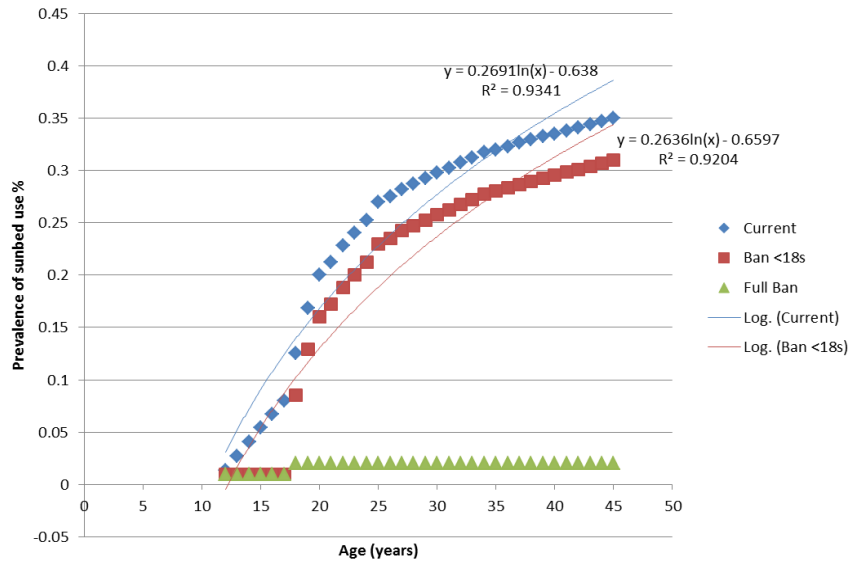

b) Europe

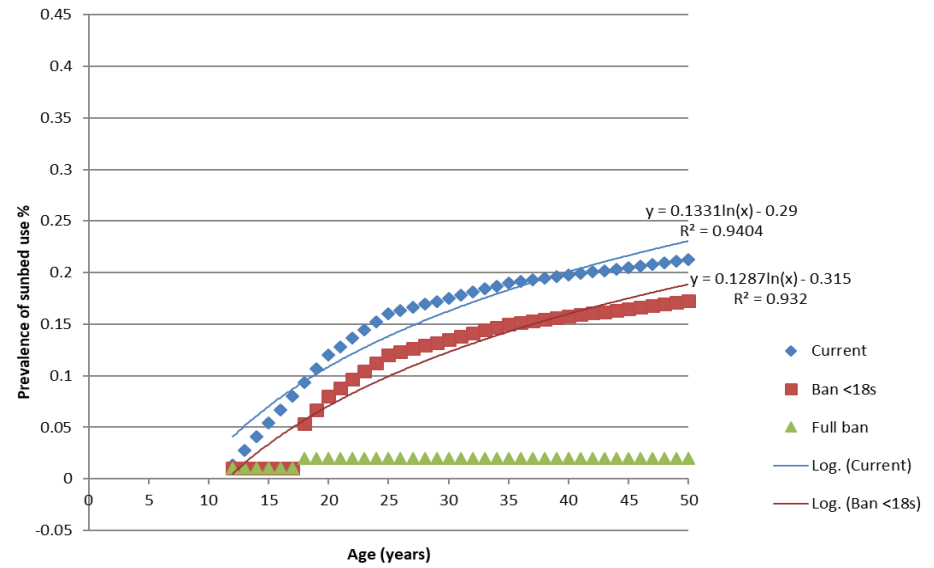

## eFigure 4. Incremental cost per life year scatterplot for full ban vs current use in North America

Note: Each dot represents an incremental cost and incremental life year pairing using the assigned distributions around each model parameter, selected randomly during 5000 iterations. Dots falling to the right of the diagonal & vertical lines (the willingness-to-pay threshold of \$50,000 per life year saved) are cost-effective. The proportion of simulations cost-effective is 83.4%. The oval is the 95% ellipse and represents the 95% uncertainty ellipsoid.

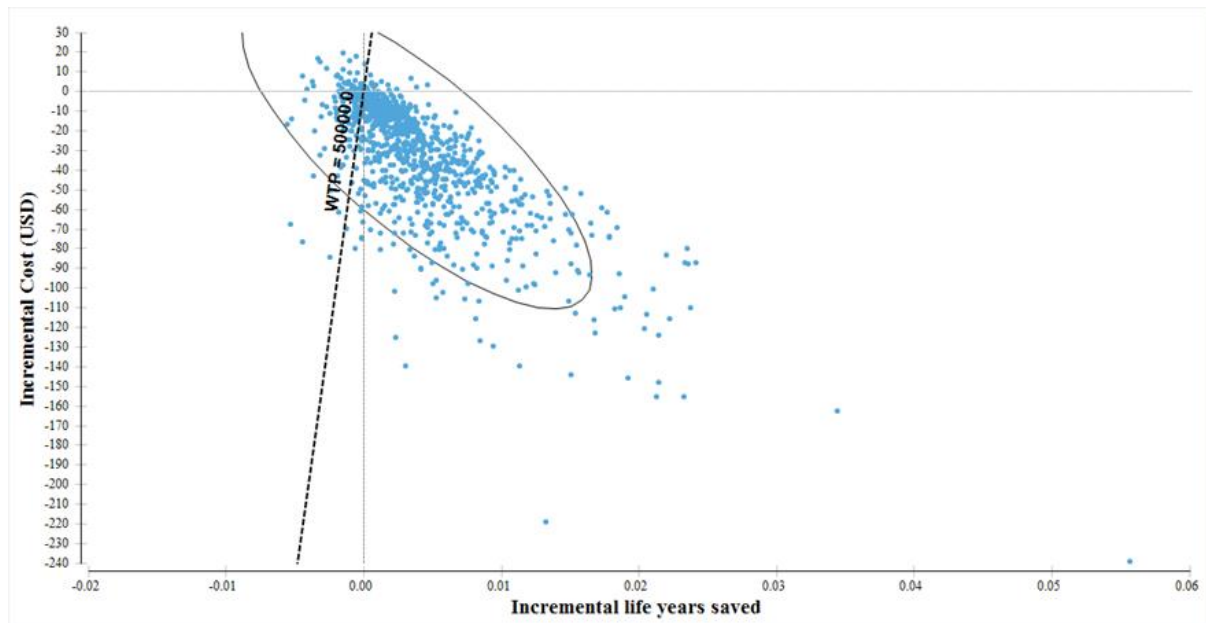

## eFigure 5. Incremental cost per life year scatterplot for full ban vs current use in Europe

Note: Each dot represents an incremental cost and incremental life year pairing using the assigned distributions around each model parameter, selected randomly during 5000 iterations. Dots falling to the right of the diagonal & vertical lines (the willingness-to-pay threshold of €30,000 per life year saved) are cost-effective. The proportion of simulations cost-effective is 83.8%. The oval is the 95% ellipse and represents the 95% uncertainty ellipsoid.

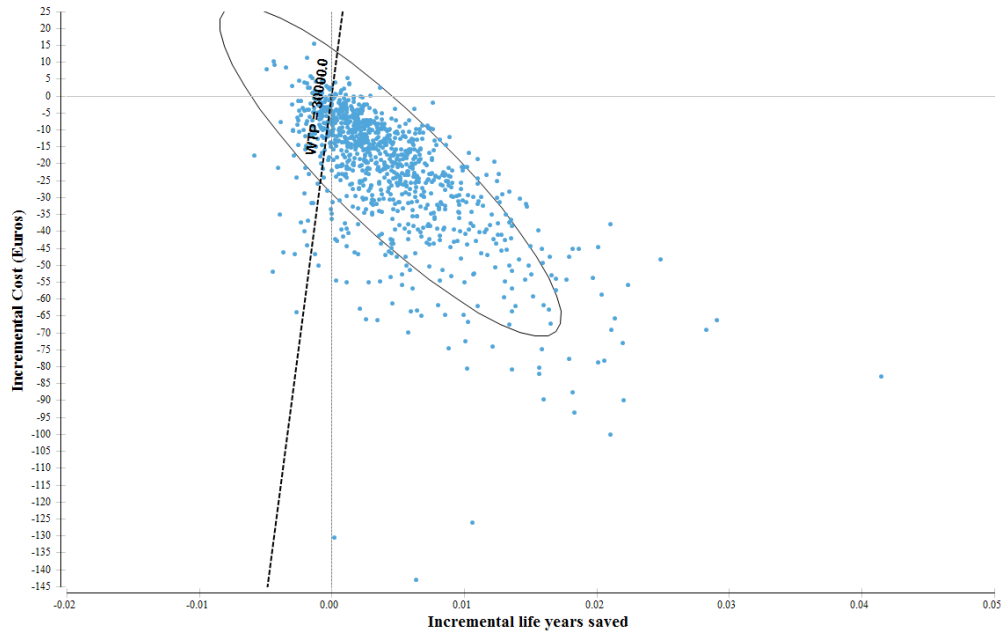

eTable 1. Comparison of pooled estimates on the prevalence of indoor tanning

|                                                  | <b>2019<br/>Rodriguez-Acevedo<sup>1</sup> meta-analysis<sup>#</sup><br/>(%, 95% CI)</b> | <b>2014<br/>Wehner<sup>2</sup> meta-analysis<sup>^</sup><br/>(%, 95% CI)</b> |
|--------------------------------------------------|-----------------------------------------------------------------------------------------|------------------------------------------------------------------------------|
| <b>Adolescents <u>past year</u><br/>exposure</b> |                                                                                         |                                                                              |
| North America                                    | 7.6% (5.1-10.5%)                                                                        | 10% (8-12%)                                                                  |
| Europe                                           | 5.1% (0.2-15.8%)                                                                        | 36% (21-52%)                                                                 |
| <b>Adults <u>ever</u> exposure</b>               |                                                                                         |                                                                              |
| North America                                    | 35.6% (23.4-48.7%)                                                                      | 35% (27-44%)                                                                 |
| Europe                                           | 22% (12-34%)*                                                                           | 42% (29-54%)                                                                 |

#This included the latest results when multiple studies from the same nation were possible (see Supplementary Figure  
<sup>^</sup> In sensitivity analyses, prevalence for all studies were included (31% 95%CI: 24-41%) which included multiple studies  
from the same nation.

eTable 2. One-way sensitivity analyses<sup>a</sup> - Full ban vs current sunbed use

|                                          | Incremental cost per life year |          |          | Probability        | Range -high     |
|------------------------------------------|--------------------------------|----------|----------|--------------------|-----------------|
|                                          | Mean                           | 2.5%     | 97.5%    | cost-effective (%) | & low mean ICER |
| <b>NORTH AMERICA model</b>               |                                |          |          |                    |                 |
| RR melanoma with sb use low 1.36         | dominant                       | dominant | dominant | 100.0%             |                 |
| RR melanoma with sb use high 1.85        | dominant                       | dominant | dominant | 100.0%             | 4546            |
| RR KCs low 1.12                          | dominant                       | dominant | 5970     | 86.6%              |                 |
| RR KCs high 2.76                         | dominant                       | dominant | 265050   | 81.8%              | -16759          |
| Cost of KCs low 984                      | dominant                       | dominant | 40209    | 85.6%              |                 |
| Cost of KCs high 1477                    | dominant                       | dominant | 61984    | 85.6%              | -602            |
| Probability of thick melanoma low 0.25   | dominant                       | dominant | 53277    | 85.6%              |                 |
| Probability of thick melanoma high 0.29  | dominant                       | dominant | 51475    | 85.6%              | 2311            |
| Cost of thick mel first year low 17059   | dominant                       | dominant | 52623    | 85.6%              |                 |
| Cost of thick mel first year high 31680  | dominant                       | dominant | 52197    | 85.6%              | -684            |
| Prob of multiple KCs low 10.9%           | dominant                       | dominant | 52018    | 85.6%              |                 |
| Prob of multiple KCs high 16.4%          | dominant                       | dominant | 54754    | 85.6%              | -326            |
| RR insitu to invasive melanoma 1.1       | dominant                       | dominant | 47726    | 85.7%              |                 |
| RR insitu to invasive melanoma 1.2       | dominant                       | dominant | 43501    | 85.7%              | 156             |
| <b>EUROPE model</b>                      |                                |          |          |                    |                 |
| RR melanoma with sb use low 1.36         | dominant                       | dominant | dominant | 100.0%             |                 |
| RR melanoma with sb use high 1.85        | dominant                       | dominant | dominant | 100.0%             | 3437            |
| RR KCs low 1.21                          | dominant                       | dominant | 13086    | 86.7%              |                 |
| RR KCs high 2.08                         | 87769                          | dominant | 153026   | 84.2%              | 124345          |
| Cost of KCs low 2309                     | dominant                       | dominant | 37525    | 85.8%              |                 |
| Cost of KCs high 3124                    | dominant                       | dominant | 51589    | 85.7%              | 384             |
| Probability of thick melanoma low 0.283  | dominant                       | dominant | 44274    | 85.8%              |                 |
| Probability of thick melanoma high 0.425 | dominant                       | dominant | 63181    | 85.9%              | -26051          |
| Cost of thick mel first year low 10195   | dominant                       | dominant | 41322    | 85.8%              |                 |
| Cost of thick mel first year high 13793  | dominant                       | dominant | 41200    | 85.8%              | -180            |
| Prob of multiple KCs low 10.9%           | dominant                       | dominant | 40519    | 85.8%              |                 |
| Prob of multiple KCs high 16.4%          | dominant                       | dominant | 42934    | 85.8%              | -1419           |

a. Each variable low and high variable was altered one and at a time and the Monte Carlo simulations were re-run. The mean incremental cost per life year were calculated and their 2.5 and 97.5 percentiles for a credible interval.



## eReferences

1. Rodriguez-Acevedo AJ, Green AC, Sinclair C, van Deventer E, Gordon LG. Indoor tanning prevalence after the International Agency for Research on Cancer statement on carcinogenicity of artificial tanning devices: systematic review and meta-analysis. *Br J Dermatol*. 2019;5(10):18412.
2. Wehner MR, Chren MM, Nameth D, et al. International prevalence of indoor tanning: a systematic review and meta-analysis. *JAMA Dermatol*. 2014;150(4):390-400. doi: 310.1001/jamadermatol.2013.6896.
3. Andrulonis R, Secrest AM, Patton TJ, Grandinetti LM, Ferris LK. A cross-sectional study of indoor tanning use among patients seeking skin cancer screening. *J Am Acad Dermatol*. 2017;76(1):164-165.
4. Daniel CL, Gassman NR, Fernandez AM, Bae S, Tan MCB. Intentional tanning behaviors among undergraduates on the United States' Gulf Coast. *BMC Public Health*. 2018;18(1):441.
5. Day AK, Wilson CJ, Hutchinson AD, Roberts RM. Acculturation, Skin Tone Preferences, and Tanning Behaviours Among Young Adult Asian Australians. *J Prim Prev*. 2016;37(5):421-432.
6. Diehl K, Gorig T, Breitbart EW, et al. First evaluation of the Behavioral Addiction Indoor Tanning Screener (BAITS) in a nationwide representative sample. *Br J Dermatol*. 2018;178(1):176-182.
7. Gajda M, Kaminska-Winciorek G, Wydmanski J, Tukiendorf A, Kowalska M. Behaviors of active sunbeds users and their knowledge on the potential health risks; results of cross-sectional study in Poland. *J Cosmet Dermatol*. 2018.
8. Gillen MM, Markey CN. The role of body image and depression in tanning behaviors and attitudes. *Behav Med*. 2012;38(3):74-82.
9. Grange F, Mortier L, Crine A, et al. Prevalence of sunbed use, and characteristics and knowledge of sunbed users: results from the French population-based Edifice Melanoma survey. *J Eur Acad Dermatol Venereol*. 2015;29 Suppl 2:23-30.
10. Heckman CJ, Handorf E, Auerbach MV. Prevalence and Correlates of Skin Cancer Screening Among Indoor Tanners and Nontanners. *JAMA Dermatol*. 2018.
11. Hillhouse J, Stapleton JL, Florence LC, Pagoto S. Prevalence and Correlates of Indoor Tanning in Nonsalon Locations Among a National Sample of Young Women. *JAMA Dermatol*. 2015;151(10):1134-1136.
12. Koster B, Meyer MKH, Andersson TM, Engholm G, Dalum P. Skin cancer projections and cost savings 2014-2045 of improvements to the Danish sunbed legislation of 2014. *Photodermatol Photoimmunol Photomed*. 2018;10(10):12424.
13. Mosher CE, Danoff-Burg S. Indoor tanning, mental health, and substance use among college students: the significance of gender. *J Health Psychol*. 2010;15(6):819-827.
14. Neenan A LS, Lesesky E B. . Reasons for Tanning Bed Use:A Survey of Community College Students in North Carolina. *NCMJ*. 2012;73(2).
15. Parsons BG, Gren LH, Simonsen SE, Harding G, Grossman D, Wu YP. Opportunities for Skin Cancer Prevention Education among Individuals Attending a Community Skin Cancer Screening in a High-Risk Catchment Area. *J Community Health*. 2018;43(2):212-219.
16. Rodriguez VM, Daniel CL, Welles BF, Geller AC, Hay JL. Friendly tanning: young adults' engagement with friends around indoor tanning. *J Behav Med*. 2017;40(4):631-640.
17. Stanganelli I, Gandini S, Magi S, et al. Sunbed use among subjects at high risk of melanoma: an Italian survey after the ban. *British Journal of Dermatology*. 2013;169(2):351-357.
18. Yang K, Han J. Indoor tanning use among white female students aged 18-30. *J Dermatol Sci*. 2017;85(3):253-256.
